# Supplementary material
Source: ML conference proceedings conference paper supplement (https://openreview.net/forum?id=StLUq88jqx9)
Supplement: supplementary_material [file attachment]

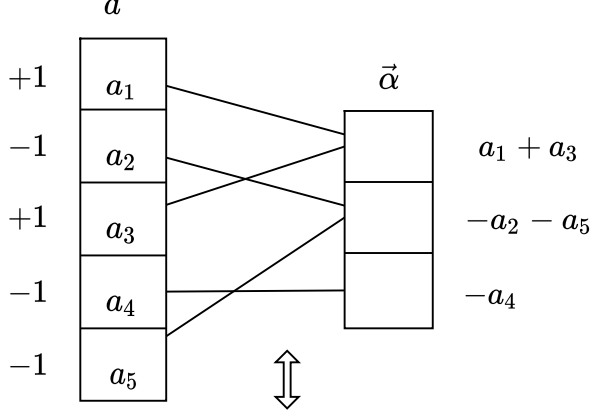

$$\begin{array}{c}
 \begin{bmatrix} 1 & 0 & 1 & 0 & 0 \\ 0 & -1 & 0 & 0 & -1 \\ 0 & 0 & 0 & -1 & 0 \end{bmatrix}
 \begin{bmatrix} a_1 \\ a_2 \\ a_3 \\ a_4 \\ a_5 \end{bmatrix}
 =
 \begin{bmatrix} a_1 + a_3 \\ -a_2 - a_5 \\ -a_4 \end{bmatrix}
 \end{array}$$
