# Supplementary material
Source: ML conference proceedings conference paper supplement (https://openreview.net/forum?id=StLUq88jqx9)

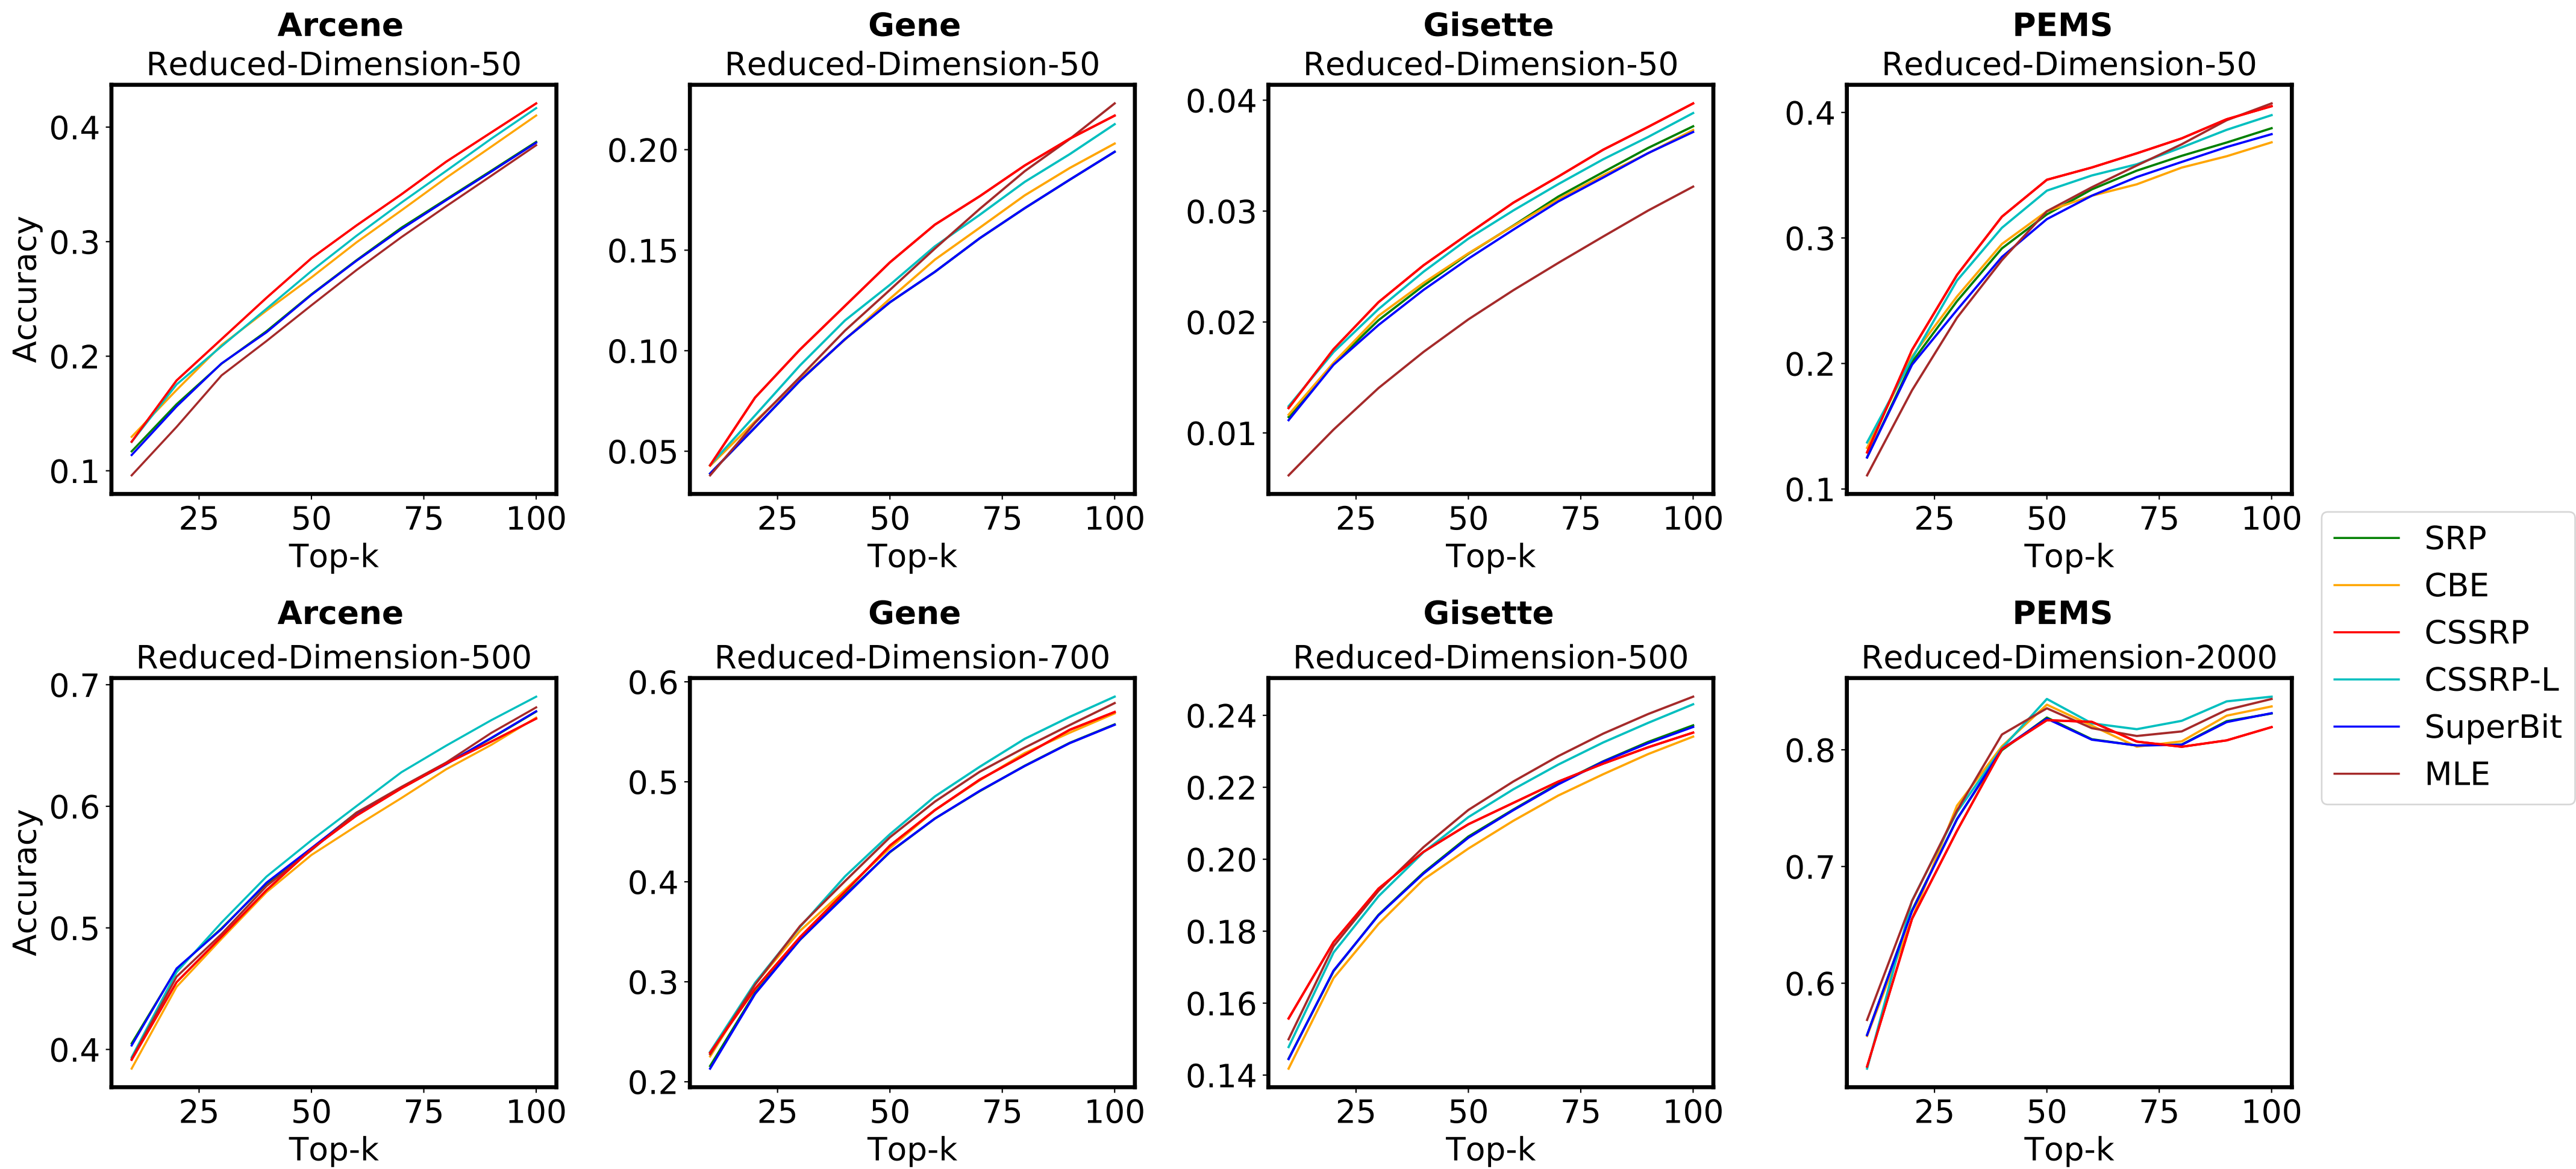

Supplement: supplementary_material [file attachment]

# Synthetic Data

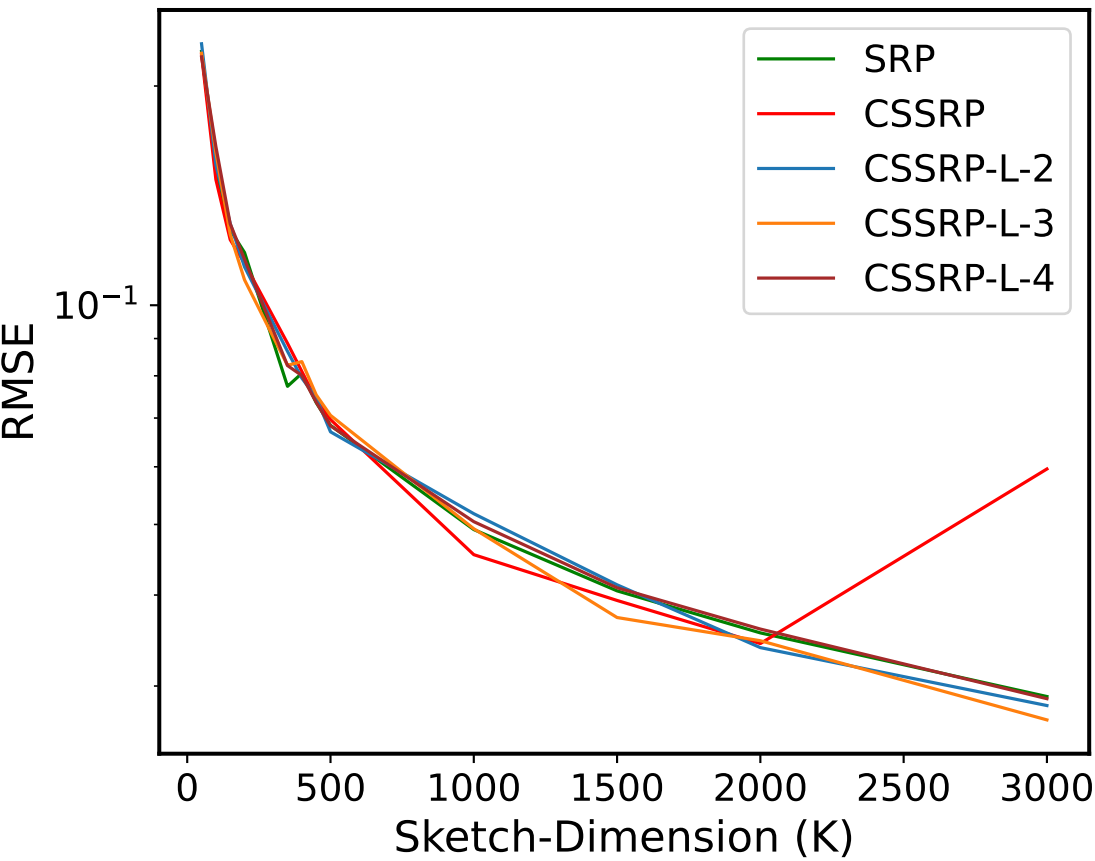

Supplement: supplementary_material [file attachment]

# Theoretical Variance

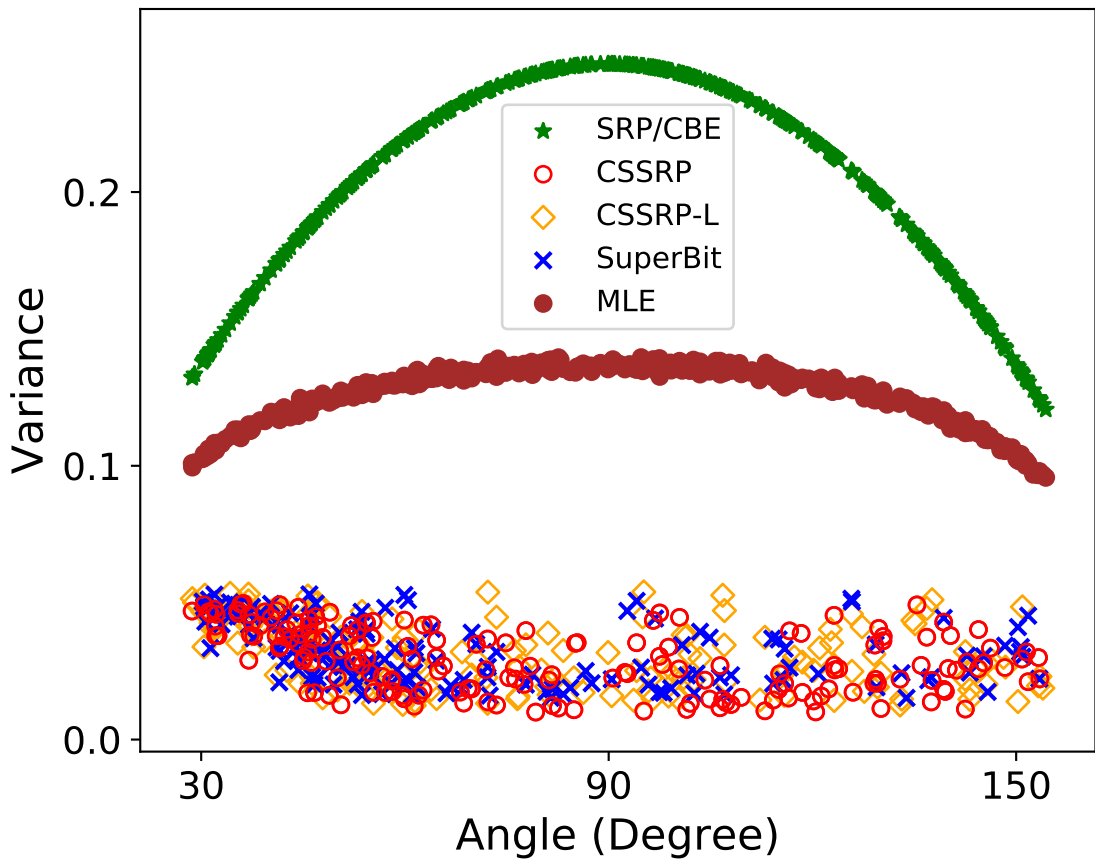

Supplement: supplementary_material [file attachment]

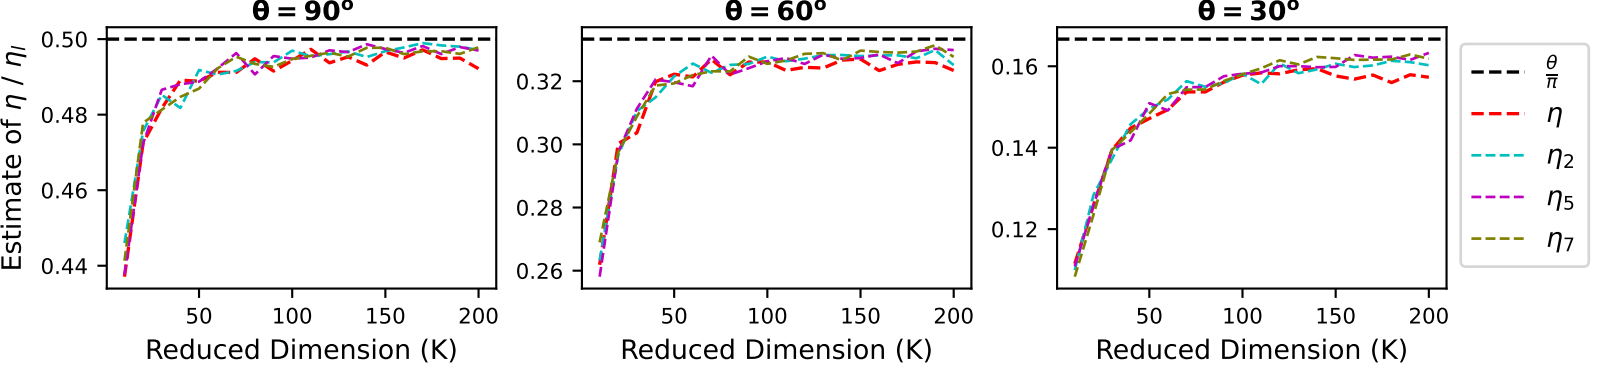

Supplement: supplementary_material [file attachment]

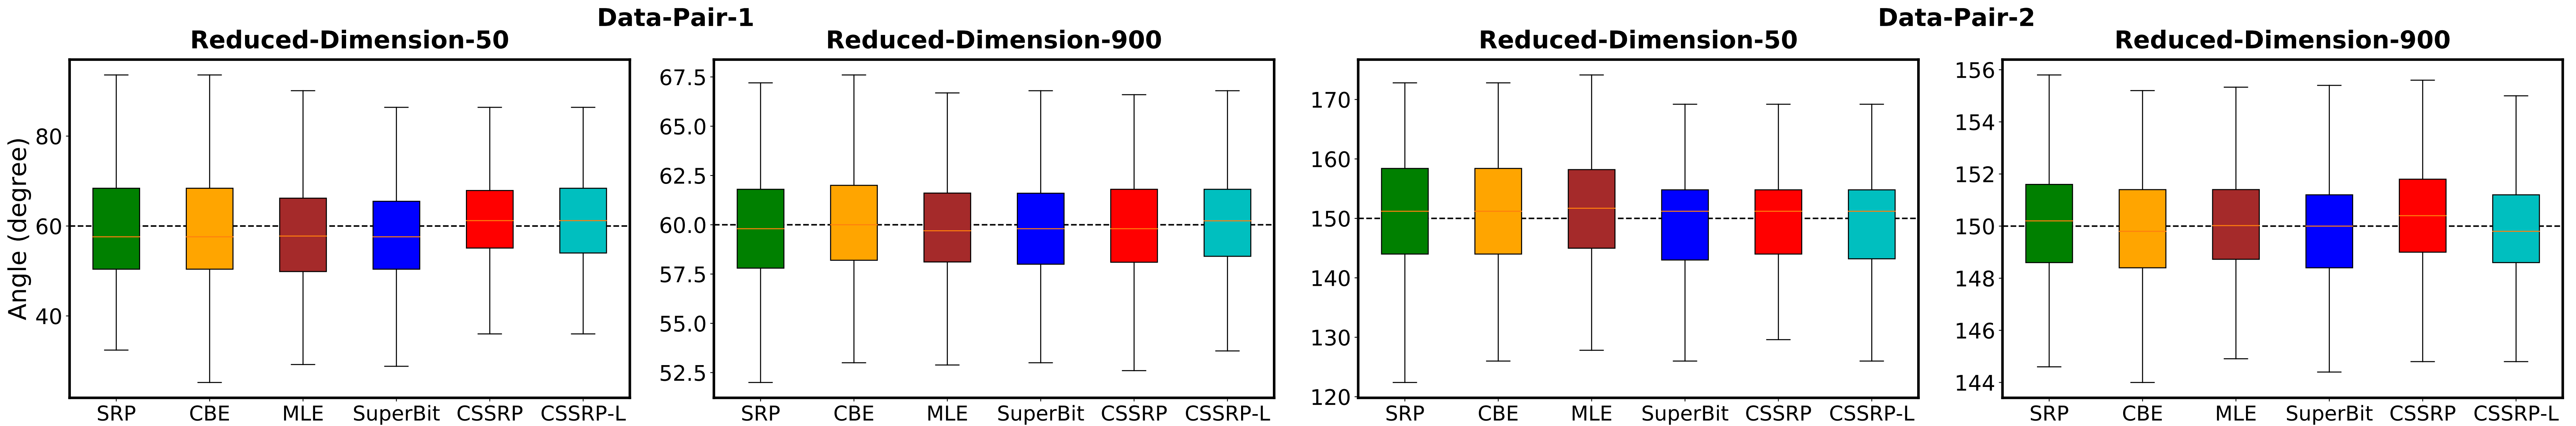

Supplement: supplementary_material [file attachment]

**Dimension- $10^5$** 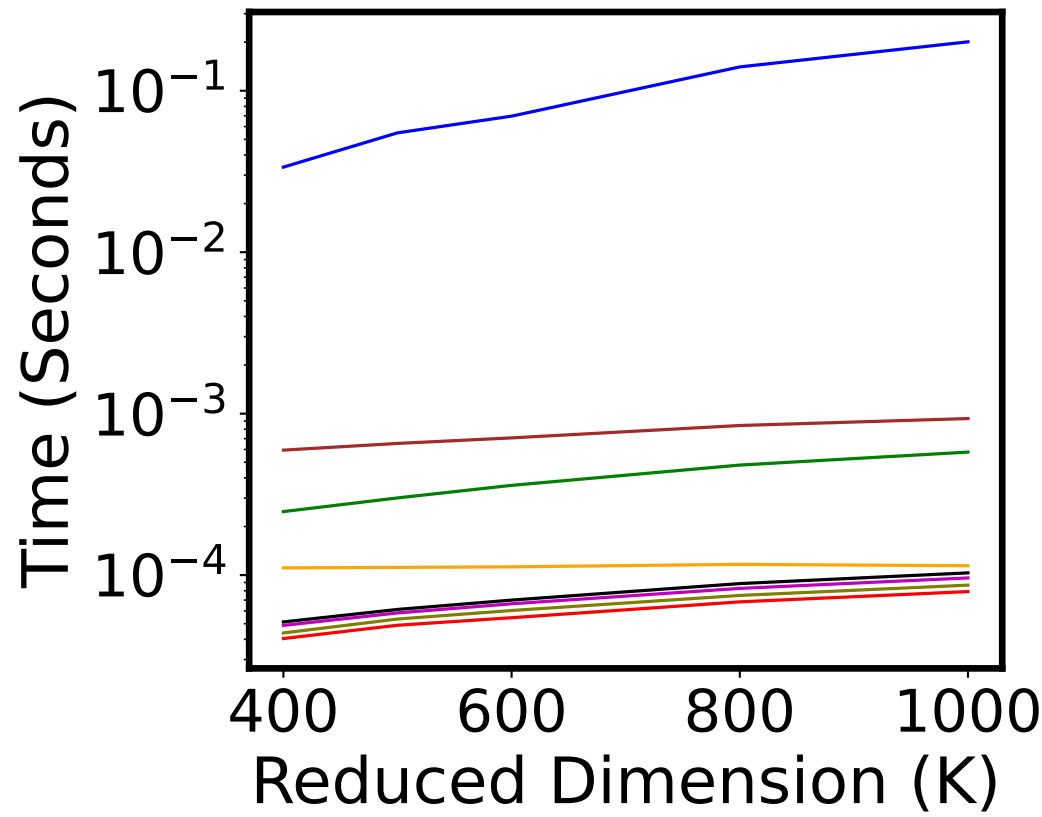**Dimension- $5 \times 10^5$** 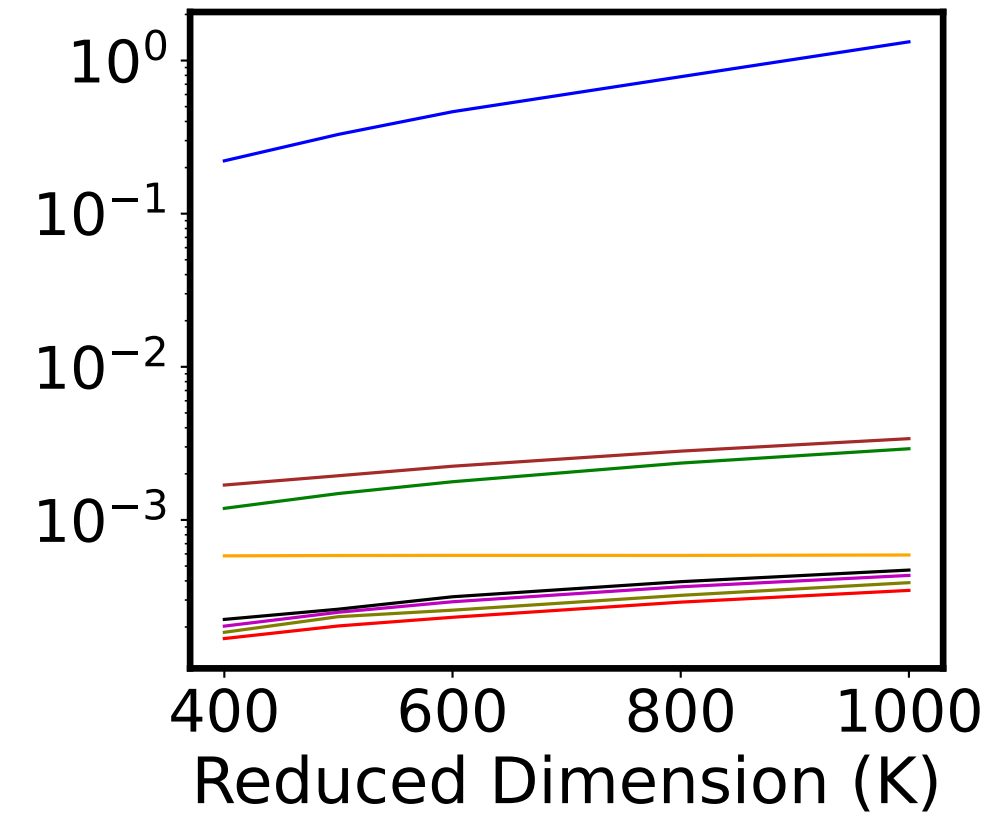**Dimension- $10^6$** 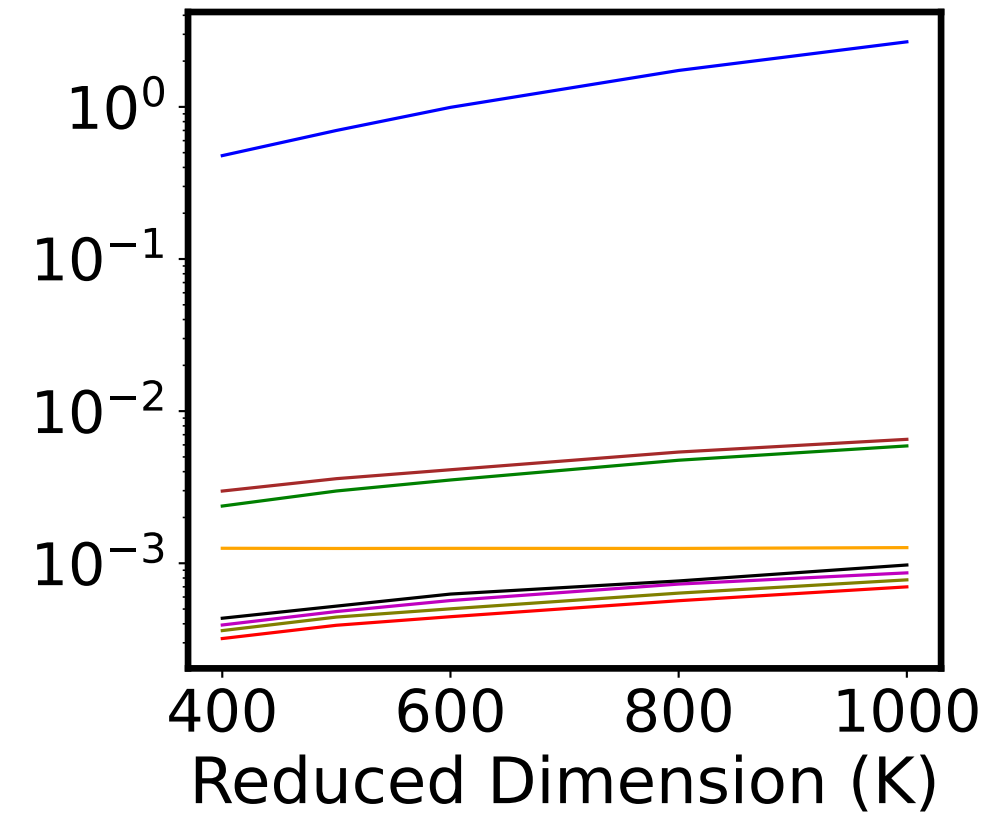**Dimension- $10^7$** 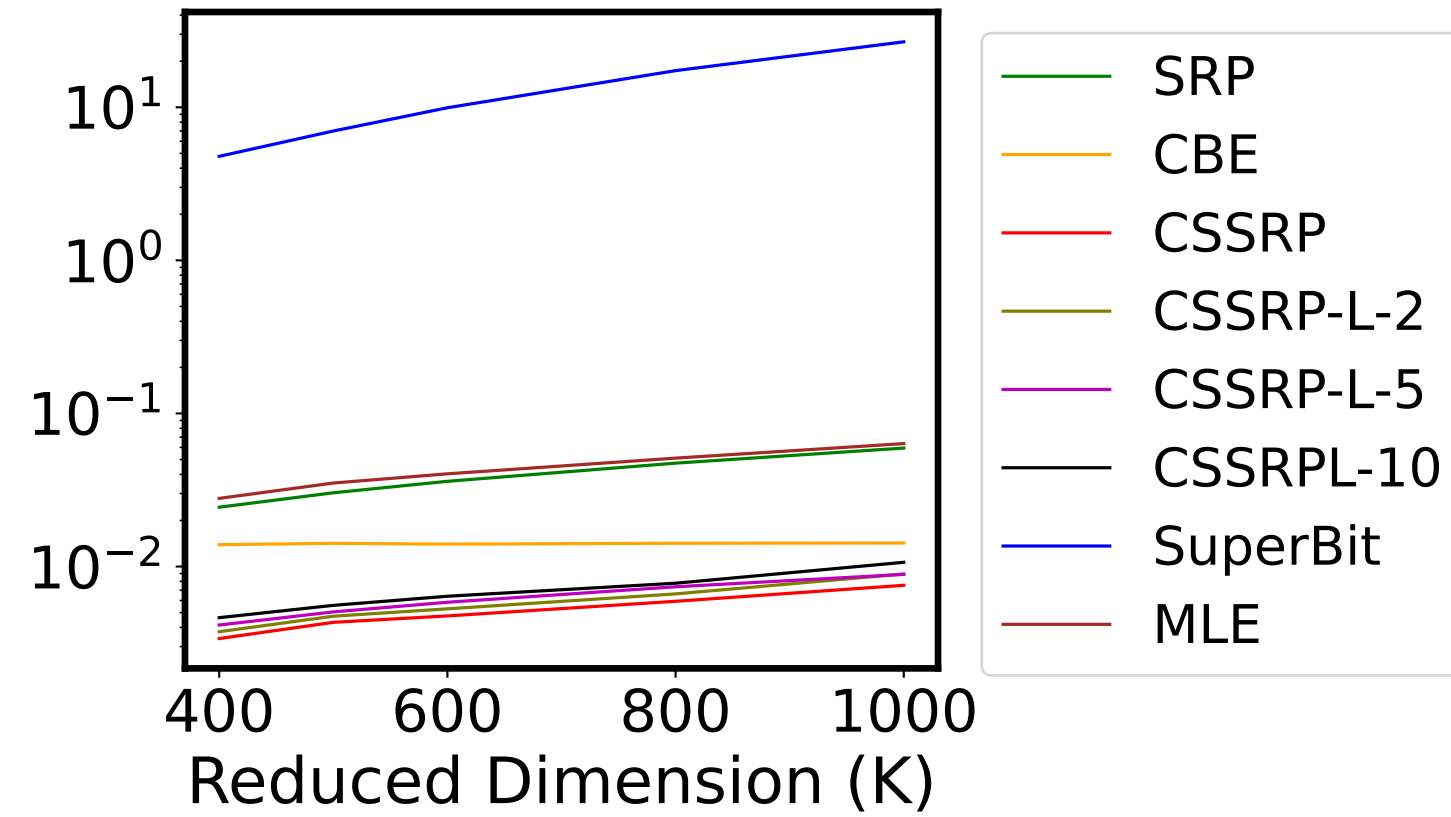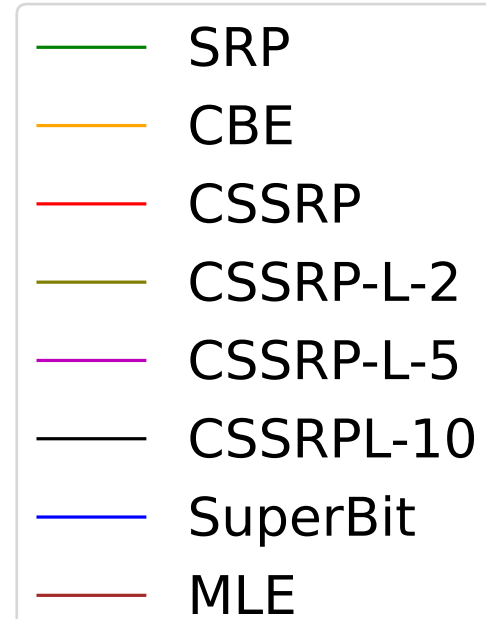

Supplement: supplementary_material [file attachment]

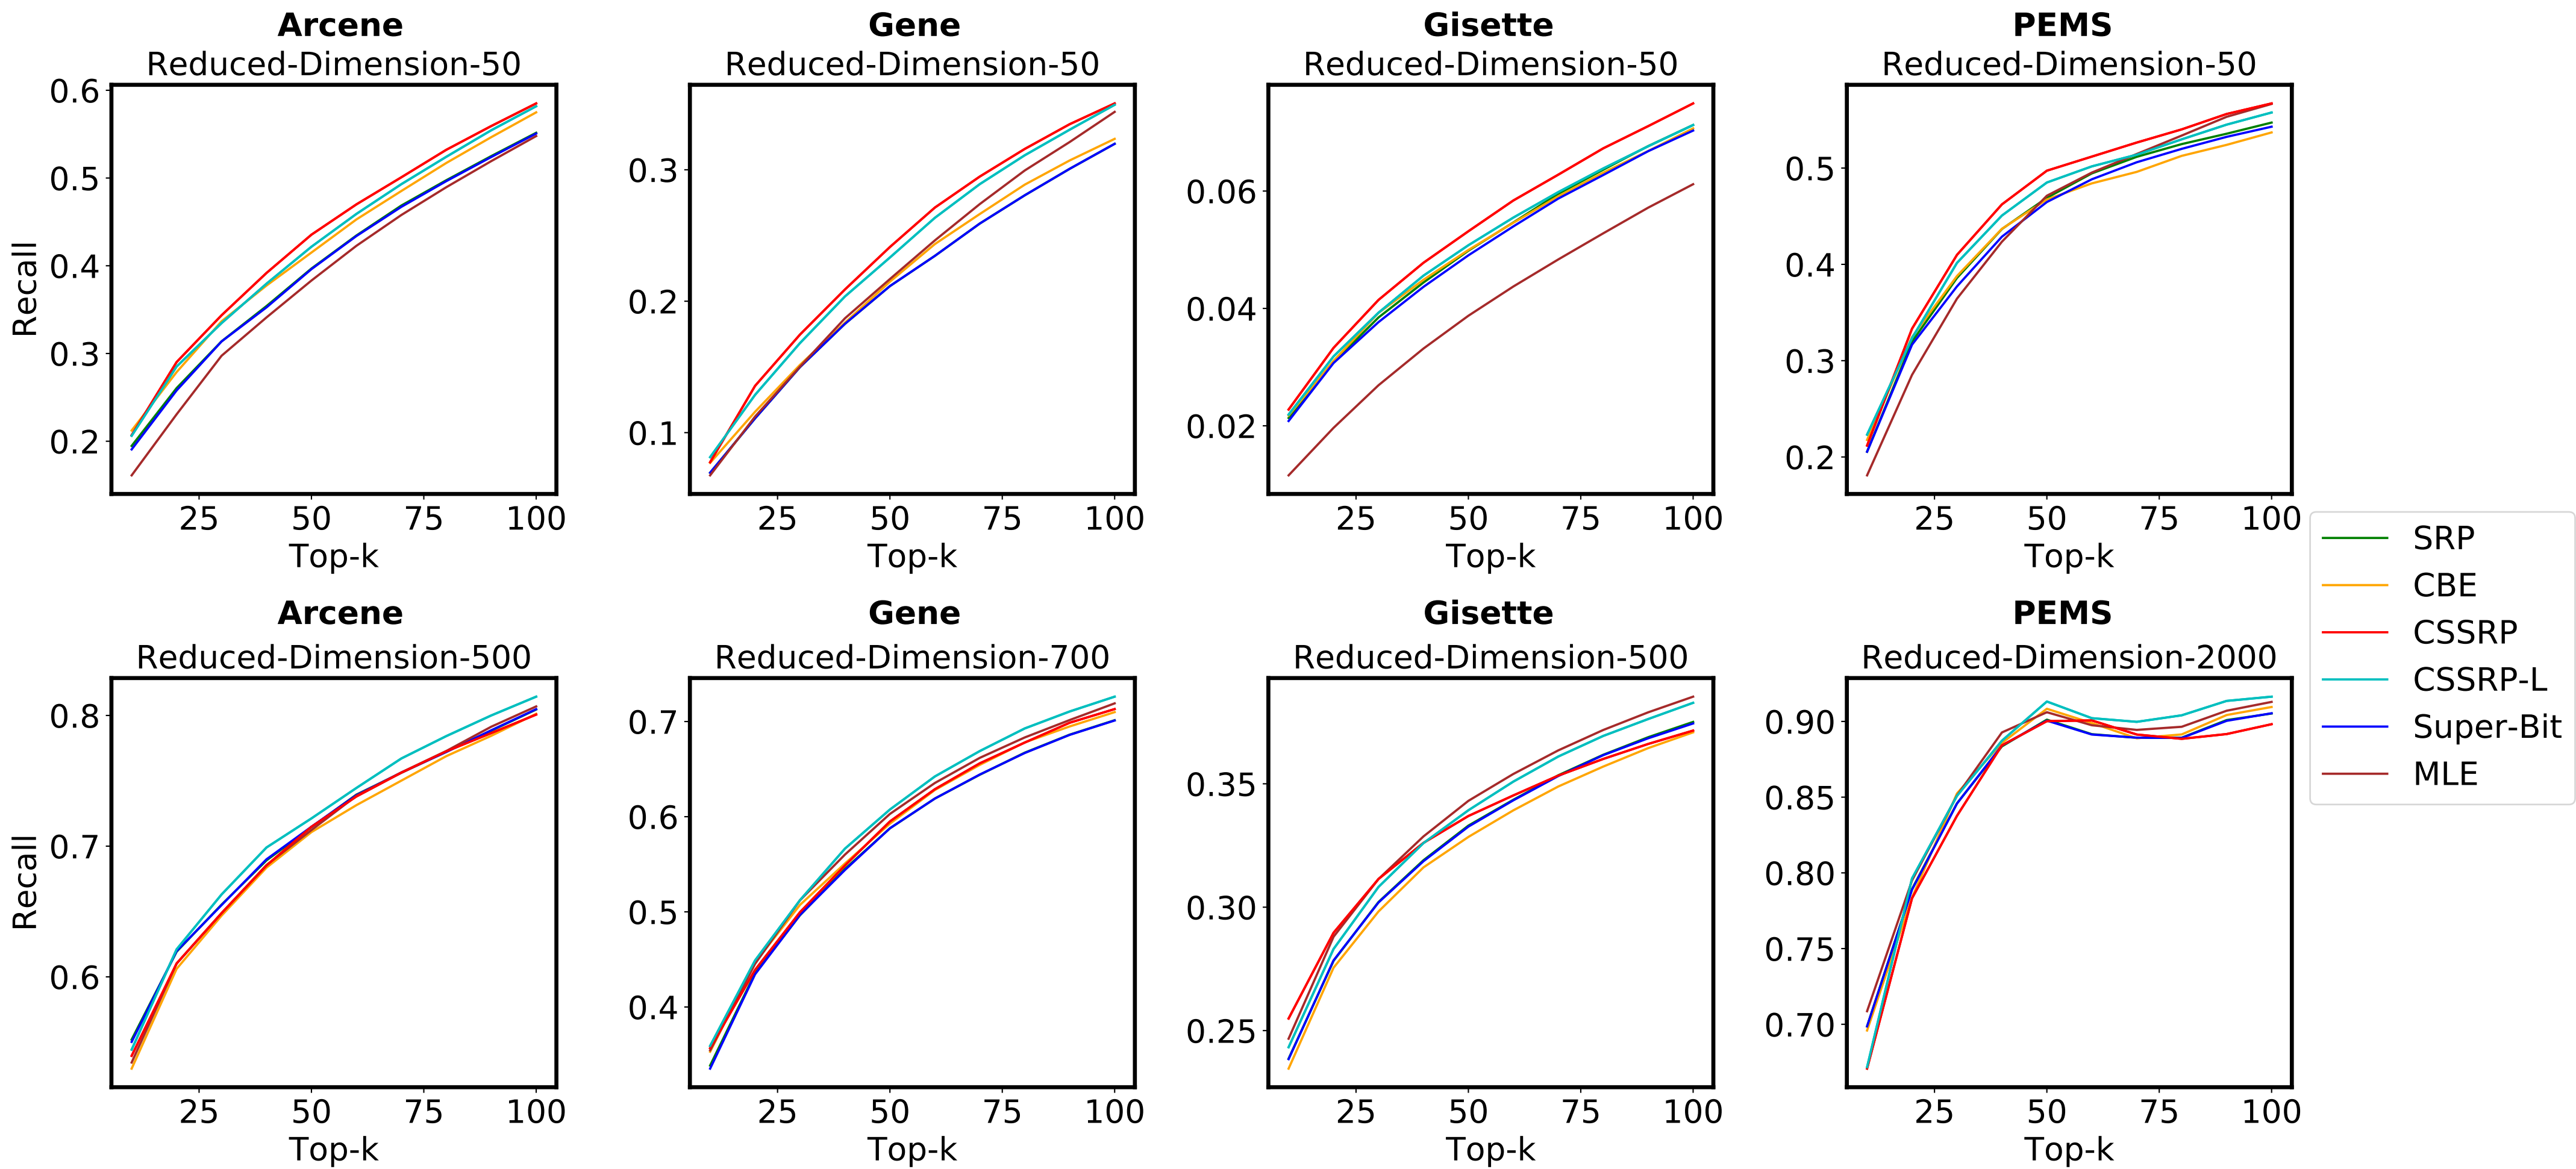

Supplement: supplementary_material [file attachment]

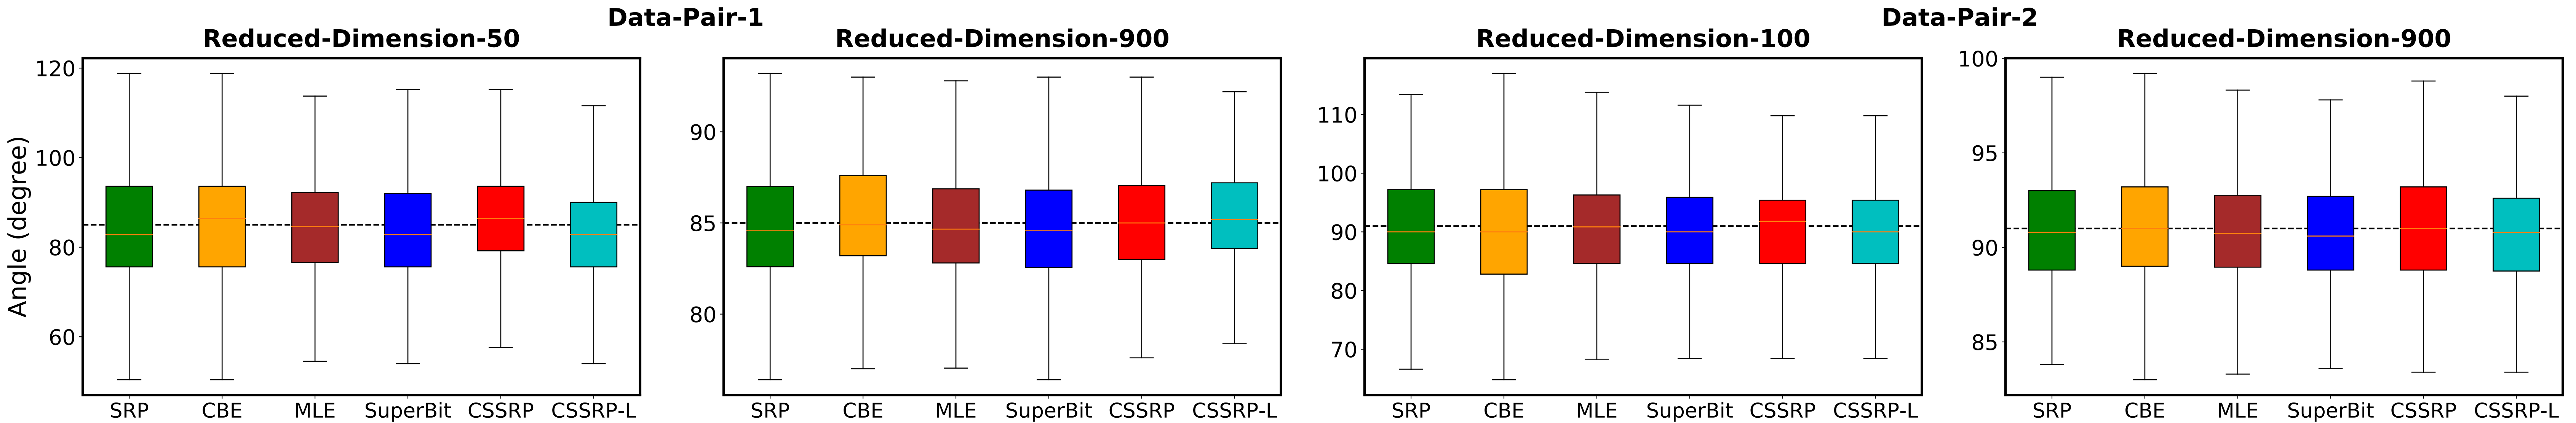

Supplement: supplementary_material [file attachment]
